# Supplementary material for: Proximity hybridization triggered strand displacement and DNAzyme assisted strand recycling for ATP fluorescence detection in vitro and imaging in living cells
Source: PubMed Central journal article supplement — RSC Adv. 2018 Aug 6;8(49):28161–71. doi: 10.1039/c8ra05193c (PMC9084323; doi:10.1039/c8ra05193c), 2018-08-06
Supplement: RA-008-C8RA05193C-s001.pdf [file RA-008-C8RA05193C-s001.pdf]

Electronic Supplementary Information (ESI)

**Proximity Binding-Induced Strand Displacement and Metal Ion-Dependent DNAzyme Recycling for ATP Detection in-Vitro and Imaging in Living Cells**

Fenglei Gao, Jing Wu, Yao Yao, Yu Zhang, Xianjiu Liao\*, Deqin Geng, and Daoquan Tang\*

Jiangsu Key Laboratory of New Drug Research and Clinical Pharmacy, School of Pharmacy, Xuzhou Medical University, 221004, Xuzhou, China.

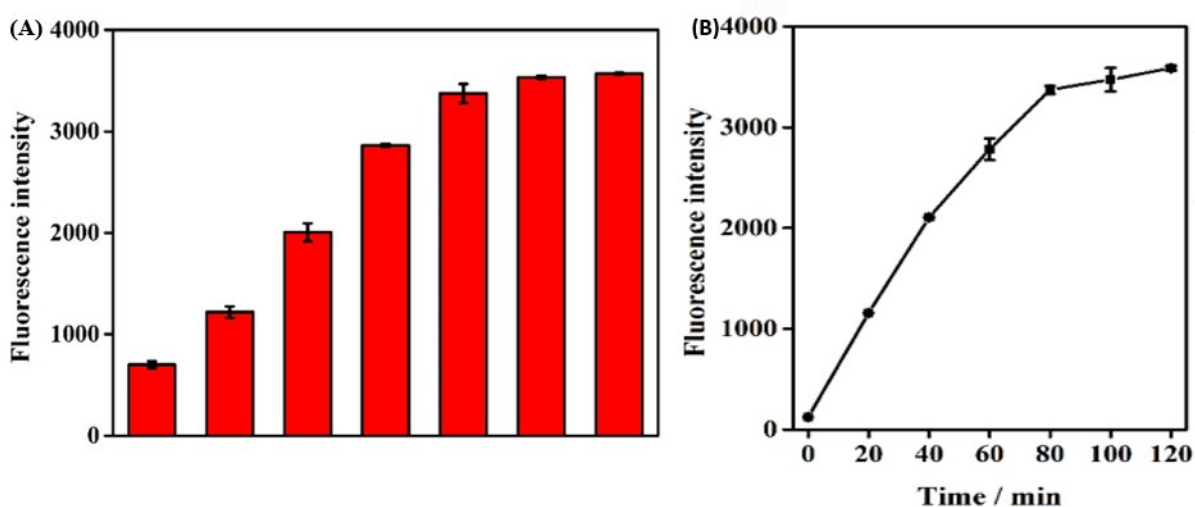

**Fig.S1** Dependence of fluorescence intensity for 1.0 mM target ATP on (A) the Pb<sup>2+</sup> concentration (from left to right: 2, 5, 8, 10, 15, 20, 30 μM); (B) the incubated time of GO nanoprobes with ATP and Pb<sup>2+</sup>.

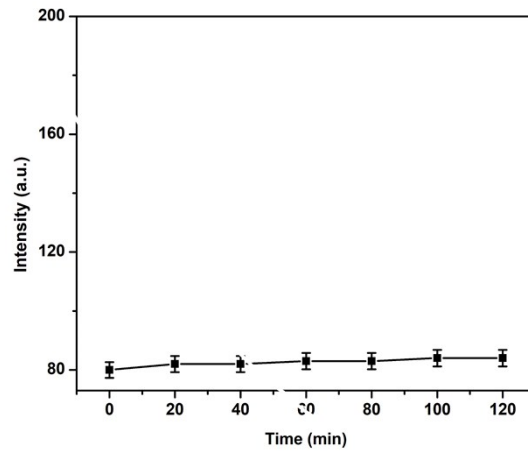

**Fig.S2** Dependence of fluorescence intensity for GO probes at different time in 10% FBS buffer.

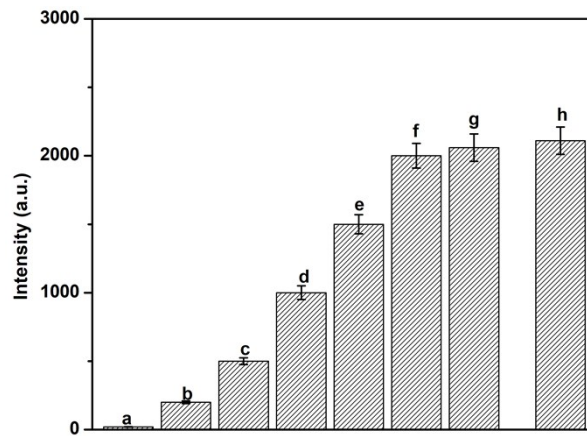

**Fig.S3** Dependence of fluorescence intensity for GO probes at different time in HeLa cell (a: 0; b: 40 min; c: 80 min; d: 120 min; e: 160 min; f: 200 min; g: 240 min; h: 300 min).
